# Supplementary material
Source: Springer Nature journal article supplement (https://www.springermedizin.de/resource/supplementary/12877_2011_698_MOESM2_ESM.pdf/9440016)

Blood pressure by Korotkoff method

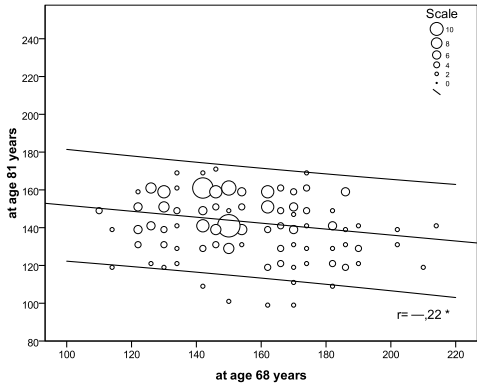

Blood pressure by Strain-Gauge method

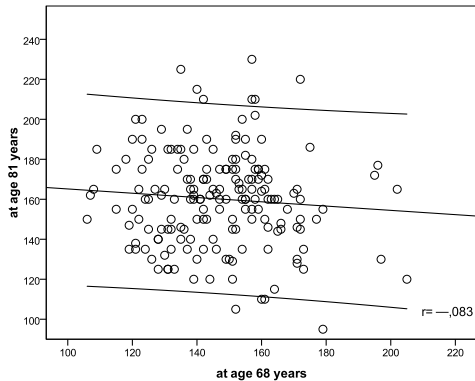

Supplement: MOESM2 [file 9440016]
